# Supplementary material for: Dinuclear triple stranded phenyl-spaced 1,3-bis-β-diketonato lanthanide(iii) complexes: synthesis, structures and spectroscopy
Source: Royal Society of Chemistry journal article supplement (doi:10.1039/d1dt00393c), 2021-01-01
Supplement: d1dt00393c1.pdf [file d1dt00393c1.pdf]

## Supporting Information

### **Dinuclear triple stranded phenyl-spaced 1,3-*bis*- $\beta$ -diketonato lanthanide(III) complexes: synthesis, structures and spectroscopy**

A. J. Brock<sup>a</sup>, I. M. Etchells<sup>a</sup>, E. G. Moore<sup>a\*</sup> and J. K. Clegg<sup>a\*</sup>

<sup>a</sup> *School of Chemistry and Molecular Biosciences, The University of Queensland, St. Lucia, QLD, Australia 4072. [egmoore@uq.edu.au](mailto:egmoore@uq.edu.au); [j.clegg@uq.edu.au](mailto:j.clegg@uq.edu.au)*

### Spectra

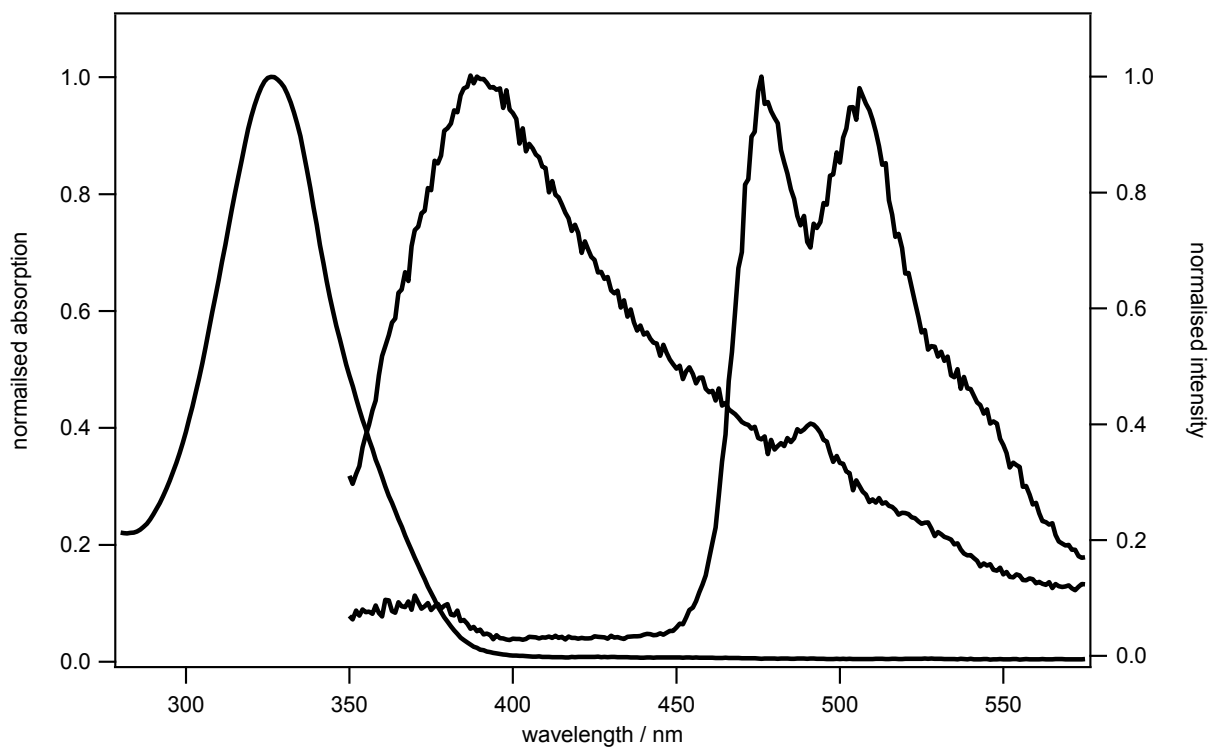

Figure S1. Spectroscopic measurements of  $[Gd_2L^{13}]$  complex. Left axis: UV-Vis (dash) in DMF. Right axis: normalised emission at 298K (solid) in DMF and at 77 K in DMF:MeOH, 1:4 (dot) ( $\lambda_{exc} = 325$  nm).

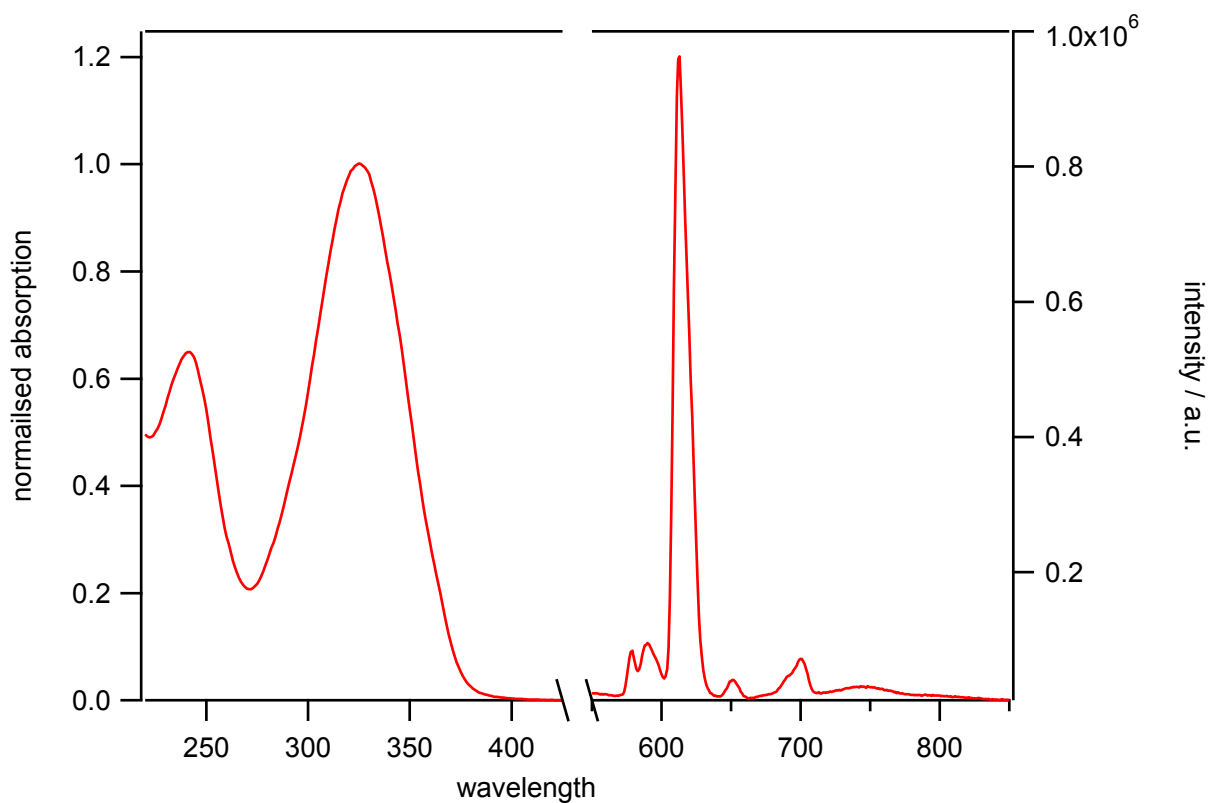

Figure S2. Spectroscopic measurements of  $[Eu_2L^{13}]$  complex. Left axis: UV-Vis (dash) in DMF. Right axis: normalised emission at 298K (solid) in DMF and at 77 K in DMF:MeOH, 1:4 (dot) ( $\lambda_{exc} = 325$  nm).

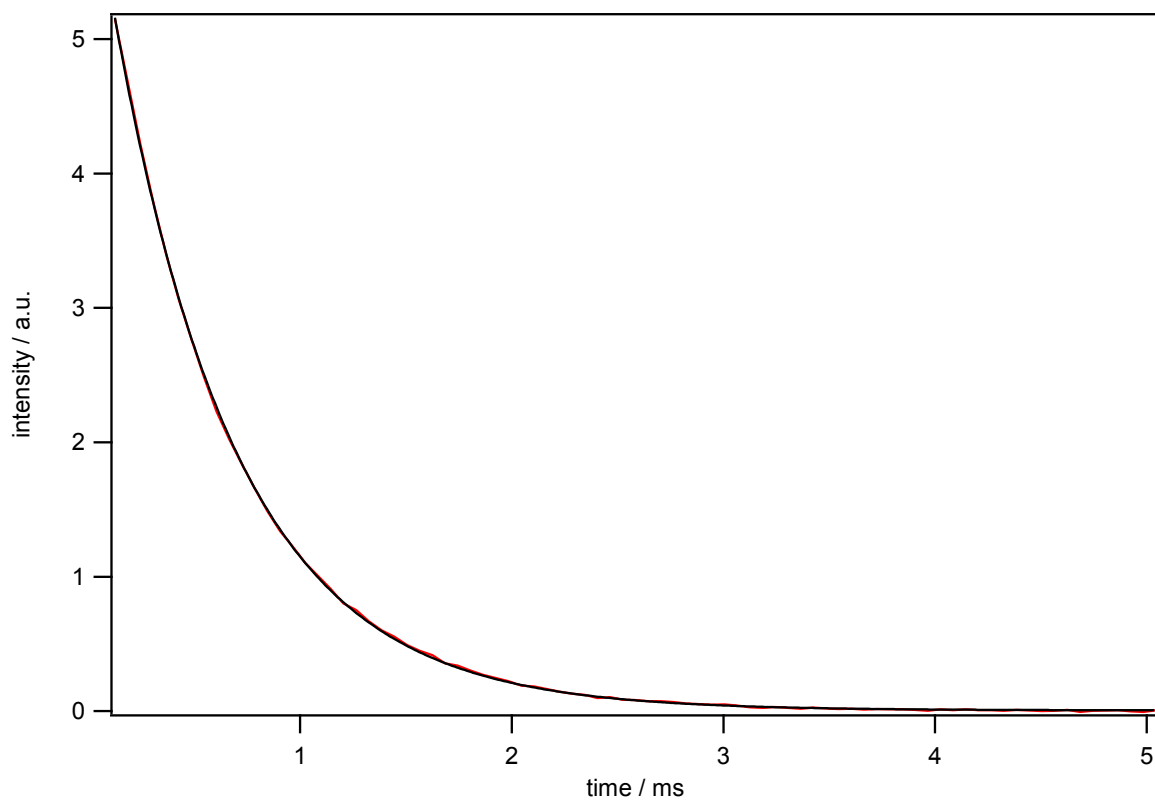

Figure S3. Emission decay ( $\lambda_{\text{exc}} = 320 \text{ nm}$ ,  $\lambda_{\text{em}} = 612 \text{ nm}$ ) of of  $[\text{Eu}_2\text{L}^1_3]$  in DMF fitted to a mono exponential with a lifetime of  $581 \pm 0.01 \mu\text{s}$ .

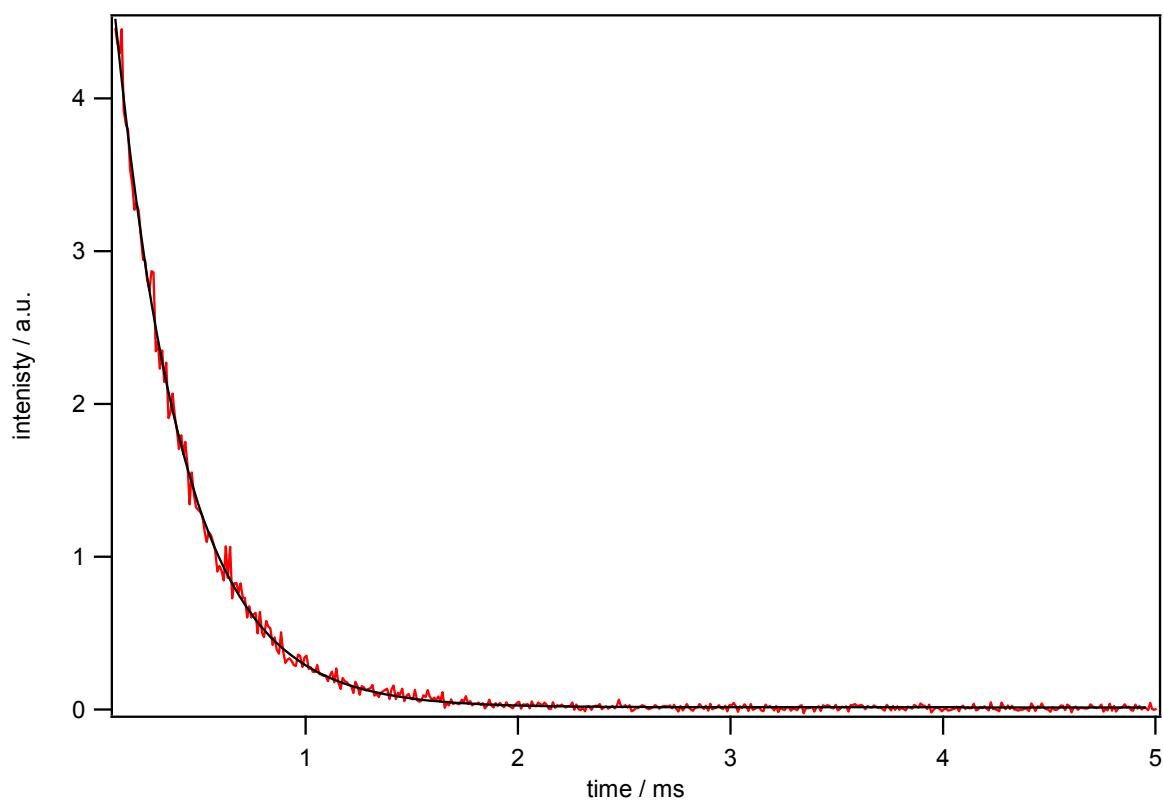

Figure S4. Emission decay ( $\lambda_{\text{exc}} = 320 \text{ nm}$ ,  $\lambda_{\text{em}} = 612 \text{ nm}$ ) of of  $[\text{Eu}_2\text{L}^1_3]$  in MeOH fitted to a mono exponential with a lifetime of  $320.38 \pm 0.04 \mu\text{s}$ .

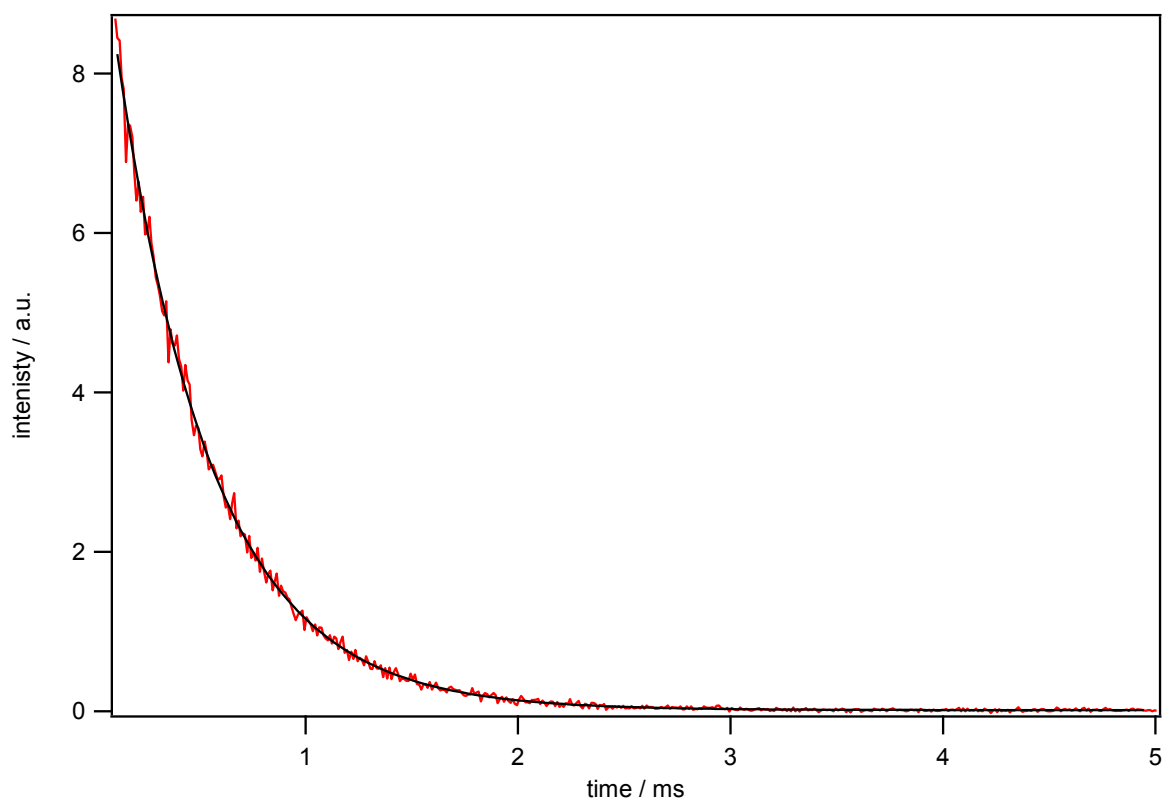

Figure S5. Emission decay ( $\lambda_{\text{exc}} = 320 \text{ nm}$ ,  $\lambda_{\text{em}} = 612 \text{ nm}$ ) of of  $[\text{Eu}_2\text{L}^1_3]$  in MeOD fitted to a mono exponential with a lifetime of  $447.42 \pm 0.04 \mu\text{s}$ .

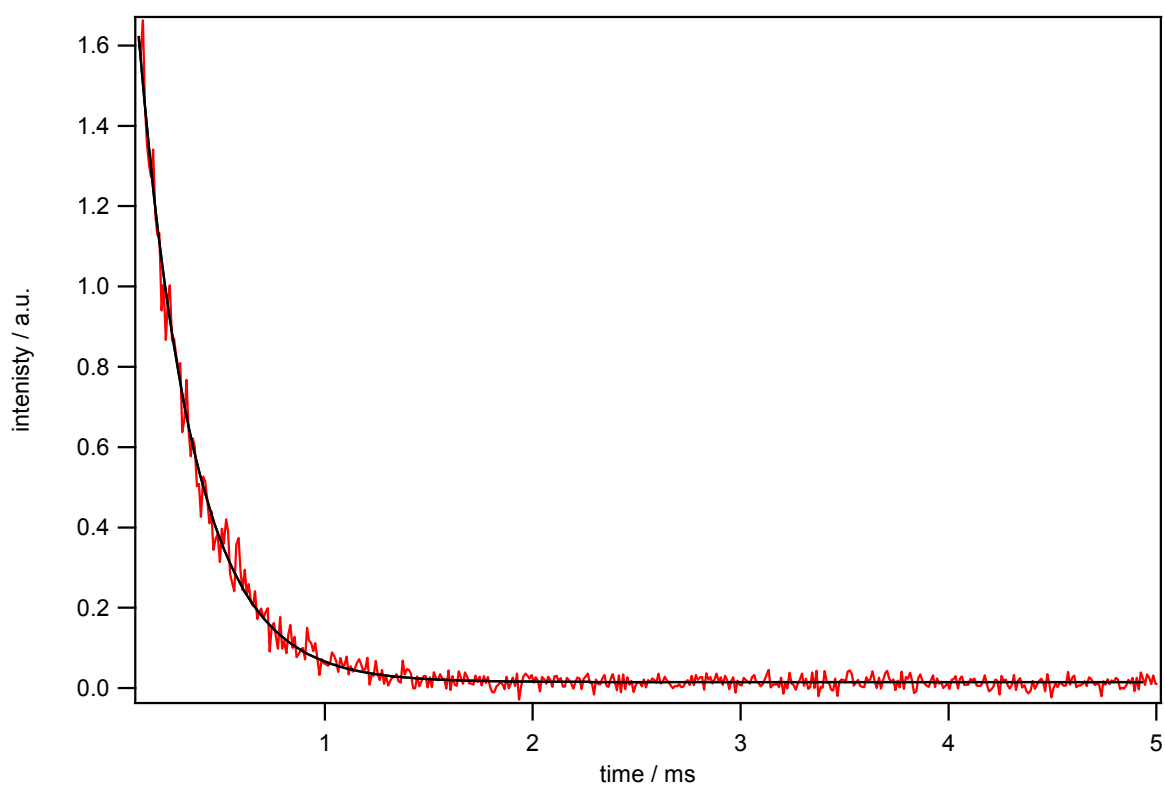

Figure S6. Emission decay ( $\lambda_{\text{exc}} = 320 \text{ nm}$ ,  $\lambda_{\text{em}} = 612 \text{ nm}$ ) of of  $[\text{EuL}^2_3]$  in MeOH fitted to a mono exponential with a lifetime of  $259.53 \pm 0.04 \mu\text{s}$ .

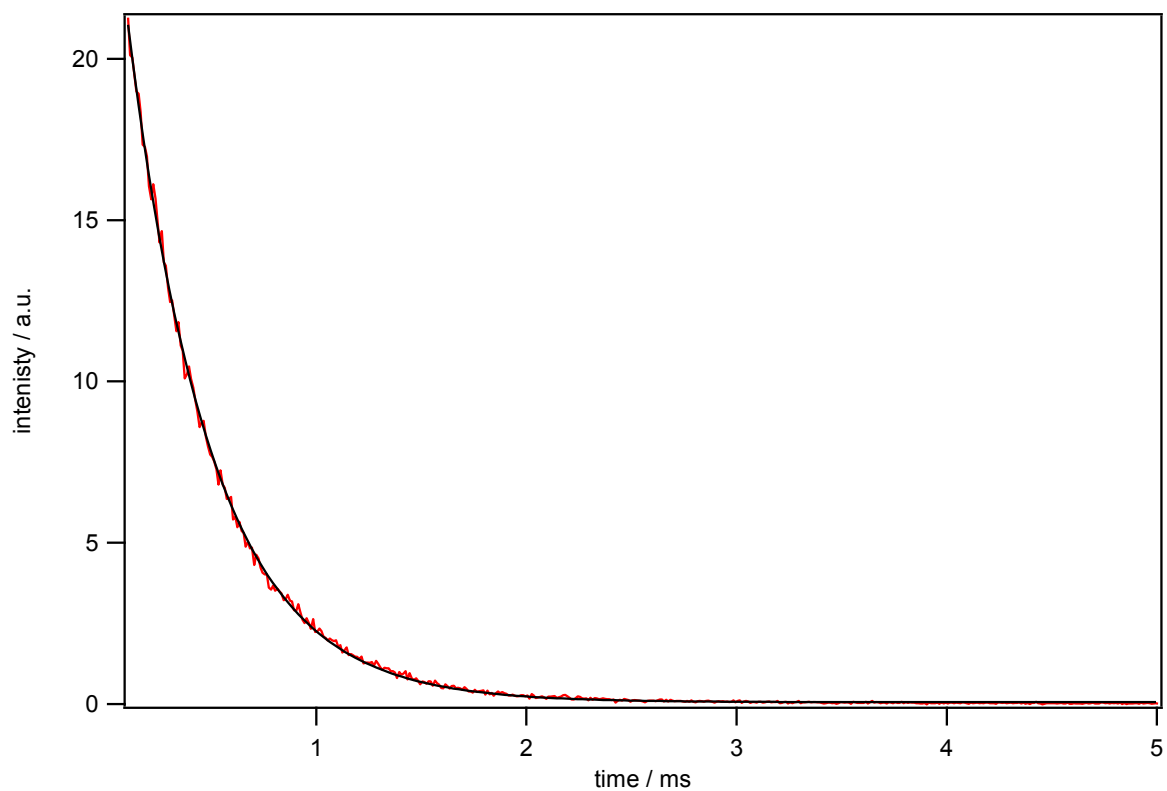

Figure S7. Emission decay ( $\lambda_{\text{exc}} = 320 \text{ nm}$ ,  $\lambda_{\text{em}} = 612 \text{ nm}$ ) of of  $[\text{EuL}_2\text{L}_3]$  in MeOD fitted to a mono exponential with a lifetime of  $396.98 \pm 0.04 \mu\text{s}$ .

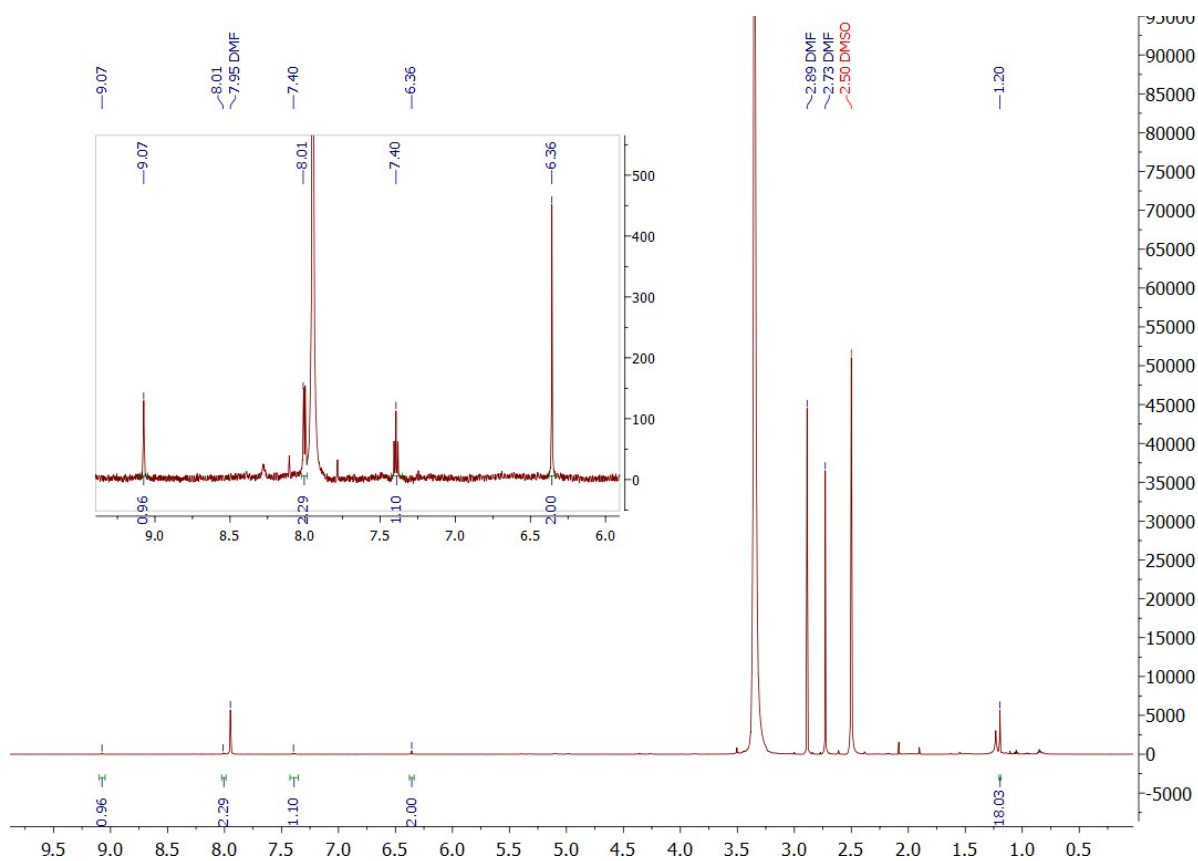

Figure S8.  $^1\text{H}$  NMR spectrum (600 MHz,  $\text{dms0-d}_6$ ) of  $[\text{Y}_2\text{L}^{13}(\text{DMF})_2]$ .
